# Supplementary material
Source: Springer Nature journal article supplement (https://www.springermedizin.de/resource/supplementary/12891_2012_1422_MOESM2_ESM.pdf/9507934)
Supplement: MOESM2 [file 9507934]

Medical diagnosis of  
CAD

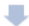

Radiological  
confirmation

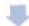

Medical record review

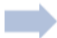

Controls (age and  
gender matched)

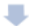

Participant interview

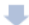

Connective tissue  
examination

Control participant  
interview

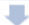

Connective tissue  
examination
